# Supplementary material for: Recovery from chronic fatigue syndrome: a systematic review—heterogeneity of definition limits study comparison
Source: HighWire-hosted journal article supplement (doi:10.1136/archdischild-2020-320196), 2021-04-12
Supplement: archdischild-2020-320196supp001_data_supplement.pdf [file archdischild-2020-320196supp001_data_supplement.pdf]

**Appendix 1:** Search strategy for Ovid MEDLINESearch terms1. Paediatric

(adolesc\* OR preadolesc\* OR pre-adolesc\* OR boy\* OR girl\* OR child\* OR infan\* OR preschool\* OR pre-school\* OR juvenil\* OR minor\* OR school\* OR pe?diatri\* OR pubescen\* OR prepubescent\* OR prepubescent\* OR puberty OR student\* OR teen\* OR young\* OR youth\* OR school\* OR high-school OR highschool OR college OR undergrad\* OR campus\* OR classroom\*) child\* or infant\* or minor\* or sibling\* or adolesc\* or preadolesc\* or pre-adolesc\* or boy\* or girl\* or preschool\* or pre-school\* or juvenil\* or school\* or schoolchild\* or school child\* or p?diatri\* or pubescen\* or prepubescent\* or pre-pubescent\* or puberty\* or student\* or teen\* or young\* or youth\* or highschool\* or high-school\* or college\* or undergrad\* or campus\* or classroom\*) (adolescen\$ or boy\$ or child\$ or children or early life or girl\$ or infan\$ or juvenile\$ or lifecourse or life course or life-course or minor\$ or preschool\$ or pre-school\$ or pre school\$ or pediater\$ or paediatric\$ or student\$ or schoolchild\$ or teenage\$ or school child\$ or teenage\$ or young or youth\$.tw. or exp Adolescent or exp Child or exp Child, Preschool or exp Infant or exp Life Change Events or exp Minors or exp Pediatrics or exp Students/

2. CFS/ME

Chronic Fatigue Syndrome.tw myalgic encephal\*.tw. CFS.tw ME.tw chronic fatigue.mp. fatigue syndrome\$.mp. exp Fatigue Syndrome, Chronic/ chronic fatigue.mp. myalgic encephalomyelitis.mp.

3. Recovery

Prognosis Outcome Trial Cohort Case-control Longitudinal
